# Supplementary figures and images for: Predictors of response to secukinumab in patients with psoriatic arthritis and axial manifestations: a post-hoc analysis of the MAXIMISE trial
Source: HighWire-hosted journal article supplement (doi:10.1136/rmdopen-2022-002303), 2022-07-01

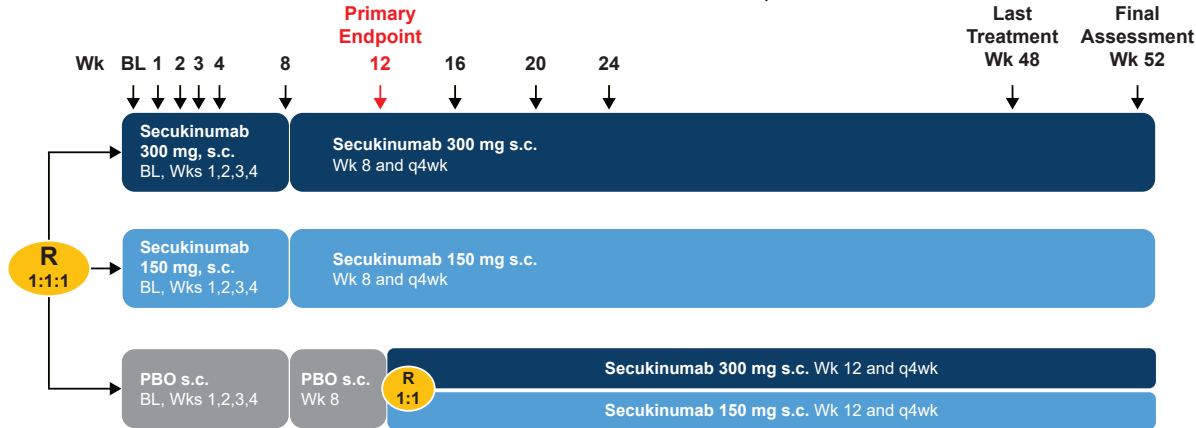

Supplement: rmdopen-2022-002303supp002_data_supplement.pdf [file rmdopen-2022-002303supp002_data_supplement.pdf]
